# Supplementary material for: Preparation of porous cellulose 3,5-dimethylphenylcarbamate hybrid organosilica particles for chromatographic applications
Source: Royal Society of Chemistry journal article supplement (doi:10.1039/c4tb01547a), 2014-10-28
Supplement: c4tb01547a1.pdf [file c4tb01547a1.pdf]

## Supplementary Material

### **Preparation of Organosilica Cellulose 3,5-Dimethylphenylcarbamate Particles of pH-Sensitive Morphology and Porosity for Chromatographic Application**

*Xilun Weng, Zongbi Bao\*, Zhiguo Zhang, Baogen Su, Huabin Xing, Qiwei Yang,*

*Yiwen Yang, Qilong Ren*

Key Laboratory of Biomass Chemical Engineering of Ministry of Education,

Department of Chemical and Biological Engineering, Zhejiang University,

Hangzhou 310027, China

\* To whom correspondence should be addressed

Tel: 86-571-8795-2773; Fax: 86-571-8795-2773.

Email: baozb@zju.edu.cn (Z. Bao)

## Supplementary discussion:

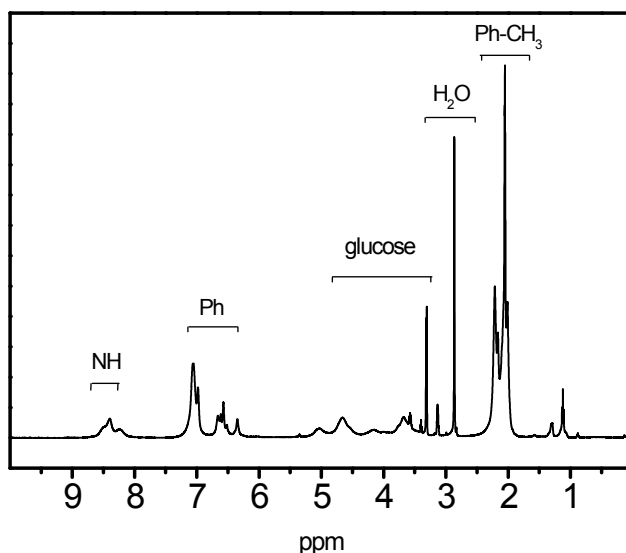

**Figure S1.**  $^1\text{H}$  NMR spectrum of the cellulose derivative

The peaks at 7.9-8.4 ppm and 6-7.5 ppm belong to the amide groups and benzene ring, respectively. The peak at 2.8-5 belongs to the hydrogen of cellulose ring and methylene at position 6, and 2-2.3 indicates H presence of  $\text{CH}_3$ -aryl groups. Since the characteristic peak of acetone- $\text{d}_6$  appears at 2.05 ppm, 0-overlaid by the peak of  $\text{CH}_3$ -aryl groups, the peak appears at 1 ppm belongs to the methyl group of  $\text{SiOCH}_2\text{CH}_3$ .

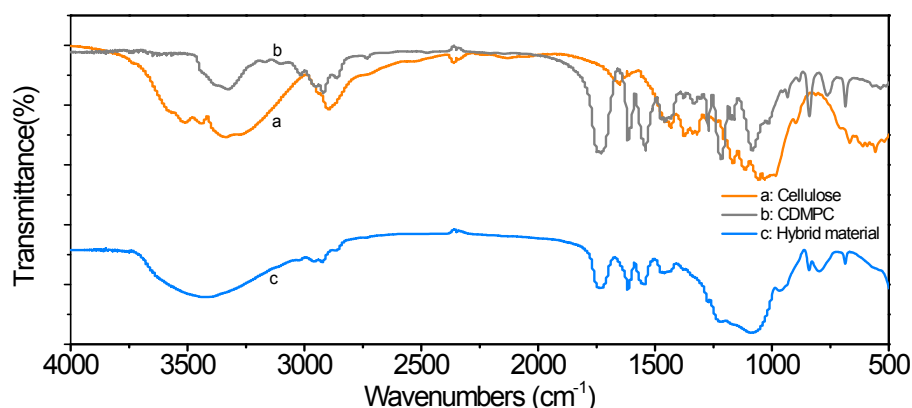

**Figure S2.** IR spectrum of the cellulose, CDMPC and hybrid material (H-15-7)

The IR spectroscopy was used to check an effective derivatization on the hydroxyl groups of cellulose. The overlaid FTIR spectra of the cellulose, CDMPC and hybrid material are shown in Figure S3. Line (a) shows a characteristic spectrum of cellulose with -OH group at  $3500\text{--}3200\text{cm}^{-1}$ , and methylene and methyl group at  $3000\text{--}2800\text{cm}^{-1}$ . While line (b) with less -OH group at  $3500\text{--}3200\text{cm}^{-1}$  shows a comparatively weak secondary amine adsorption at almost the same wave number, indicating a disappearance of hydroxyl group and appearance of amino group. The new peak at about  $1750\text{cm}^{-1}$ , certificated as carbonyl group and frame vibration of benzene at  $1600\text{--}1450\text{cm}^{-1}$ , could indirectly confirm a successful synthesis of 3,5-dimethylphenyl isocyanate. Line c with a wide and weak -OH group of residual product of hydrolysis, the characteristic  $1750\text{cm}^{-1}$  for carbonyl group indicates the hybrid material preserves the functional group of organic component. Particularly, the peak at  $470\text{cm}^{-1}$  is due to the bending mode of Si-O-Si and Si-OH group, which is the key intermediate, being instrumental to the whole process, where the silanol groups of the CDMPC are highly capable of hydrolysis and condensed with the silanol groups

**Solid  $^{13}\text{C}$  NMR sample HH-15-7**

Chemical structure of the sample is shown, featuring a cellulose backbone with carbamate groups. The structure includes a repeating unit with a cellulose backbone and a carbamate group attached to the C4 position. The carbamate group is defined as  $\text{R}_2\text{OCONHR}_1\text{HNOCOR}_2$ . The structure also shows a methyl group and a TMSI group.

The  $^{13}\text{C}$  NMR spectrum (ppm (t1)) is displayed below the structure, showing peaks corresponding to the chemical shifts listed above. The spectrum includes peaks for the carbamate group, cellulose, and TMSI. The peaks are labeled with their corresponding chemical shifts: 152.487, 138.347, 125.392, 116.065, 102.879, 73.302, 65.711, 21.070, and 1.206.

Chemical structure of the cellulose backbone is shown, with the repeating unit defined as  $\text{R}_2\text{OCONHR}_1\text{HNOCOR}_2$ . The structure also shows a methyl group and a TMSI group.

The  $^{13}\text{C}$  NMR spectrum (ppm (t1)) is displayed below the structure, showing peaks corresponding to the chemical shifts listed above. The spectrum includes peaks for the carbamate group, cellulose, and TMSI. The peaks are labeled with their corresponding chemical shifts: 152.487, 138.347, 125.392, 116.065, 102.879, 73.302, 65.711, 21.070, and 1.206.

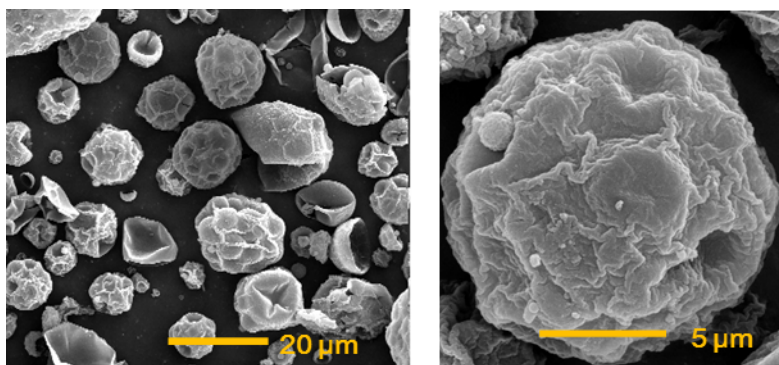

**Figure S4.** SEM micrographs of dimethylphenyl carbamate/3-(triethoxysilyl)propyl ratio 98:2 particles (H1-15-7) prepared under aging pH=7
